# Supplementary material
Source: publisher figshare collection journal article supplement (https://diabetesjournals.figshare.com/ndownloader/files/28920753)

# The effect of dapagliflozin on albuminuria in the DECLARE-TIMI 58 trial

Ofri Mosenzon MD MSc<sup>1</sup>, Stephen D Wiviott MD<sup>2</sup>, Hiddo H J Heerspink PhD<sup>3</sup>, Jamie P Dwyer MD<sup>4</sup>, Avivit Cahn MD<sup>1</sup>, Erica L Goodrich MS<sup>2</sup>, Aliza Rozenberg MA<sup>1</sup>, Meir Schechter MSc<sup>1</sup>, Ilan Yanuv MSc<sup>1</sup>, Sabina A Murphy MPH<sup>2</sup>, Thomas A Zelniker MD MSc<sup>2,5</sup>, Ingrid A M Gause-Nilsson MD<sup>6</sup>, Anna Maria Langkilde MD<sup>6</sup>, Martin Fredriksson MD<sup>6</sup>, Peter A Johansson MSc<sup>6</sup>, Deepak L Bhatt MD MPH<sup>2</sup>, Lawrence A Leiter MD<sup>7</sup>, Darren K McGuire MD<sup>8</sup>, John P H Wilding MD<sup>9</sup>, Marc S Sabatine MD<sup>2</sup>, Itamar Raz MD<sup>1</sup>

<sup>1</sup> The Diabetes Unit, Department of Endocrinology and Metabolism, Hadassah Medical Center, The Faculty of Medicine, Hebrew University of Jerusalem, Jerusalem, Israel

<sup>2</sup> TIMI Study Group, Cardiovascular Division, Brigham and Women's Hospital and Harvard Medical School, Boston, MA, USA

<sup>3</sup> University Medical Center Groningen, University of Groningen, Groningen, Netherlands and The George Institute for International Health, Sydney, Australia

<sup>4</sup> Vanderbilt University Medical Center, Nashville, TN, USA.

<sup>5</sup> Division of Cardiology, Medical University of Vienna, Austria

<sup>6</sup> Bio Pharmaceuticals R&D, AstraZeneca Gothenburg, Sweden

<sup>7</sup> Li Ka Shing Knowledge Institute, St. Michael's Hospital, University of Toronto, Ontario, Canada

<sup>8</sup> Division of Cardiology, University of Texas Southwestern Medical Center, Dallas, TX, USA and Parkland Health and Hospital System

<sup>9</sup> Department of Cardiovascular and Metabolic Medicine, University of Liverpool, Liverpool, United Kingdom

**Key words:** Type 2 diabetes; Dapagliflozin; SGLT2i; Diabetic kidney disease; Prevention; Urinary albumin to creatinine ratio (UACR).

Running title: Albuminuria in the DECLARE-TIMI 58

## Supplementary materials

**Table S1:** Distribution of categorical UACR at baseline and 6 months' time points in dapagliflozin vs. placebo arm.

| Visit    | UACR categories | Dapagliflozin |       | Placebo |       | P-value |
|----------|-----------------|---------------|-------|---------|-------|---------|
|          |                 | N             | %     | N       | %     |         |
| Baseline | ≤15 mg/g        | 4381          | 54.0% | 4346    | 54.0% | 0.9899  |
|          | 15-<30 mg/g     | 1240          | 15.3% | 1244    | 15.4% |         |
|          | ≥30-≤300 mg/g   | 1942          | 23.9% | 1915    | 23.8% |         |
|          | >300 mg/g       | 555           | 6.8%  | 549     | 6.8%  |         |
| 6 months | ≤15 mg/g        | 4508          | 55.7% | 4168    | 51.8% | <0.0001 |
|          | 15-<30 mg/g     | 1317          | 16.3% | 1246    | 15.5% |         |
|          | ≥30-≤300 mg/g   | 1853          | 22.9% | 2019    | 25.1% |         |
|          | >300 mg/g       | 412           | 5.1%  | 591     | 7.3%  |         |

Legends: Participants distribution within the UACR categories at baseline and at 6 months, among those with readings at both time points. Comparison between treatment arms was performed using the  $\chi^2$  test. UACR – Urinary Albumin to Creatinine Ratio

**Figure S1:** One time change in categorical UACR from baseline to end of trial (EOT) in dapagliflozin vs. placebo arm. A. Improvement in UACR categories B. Deterioration in UACR categories

### A. Improvement

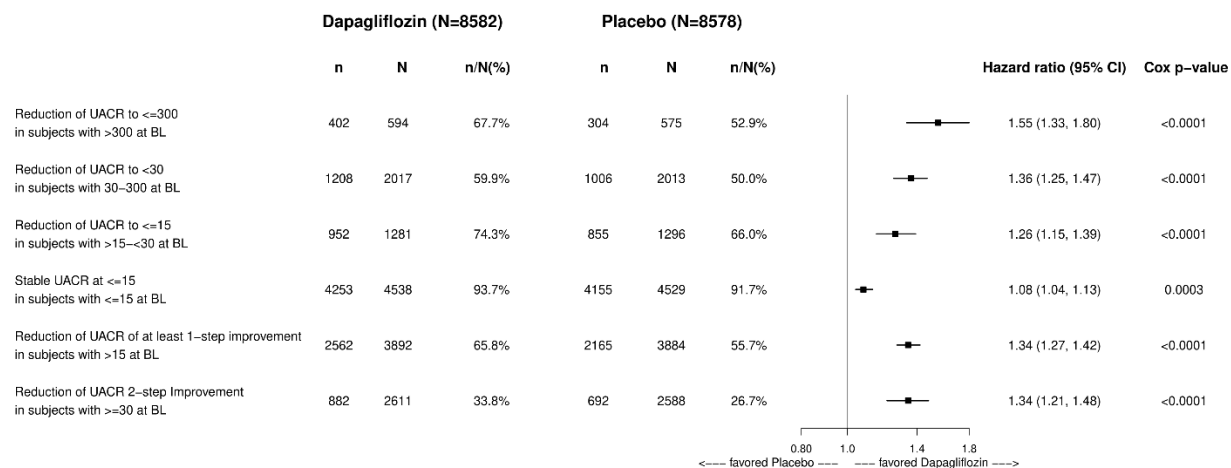

## B. Deterioration

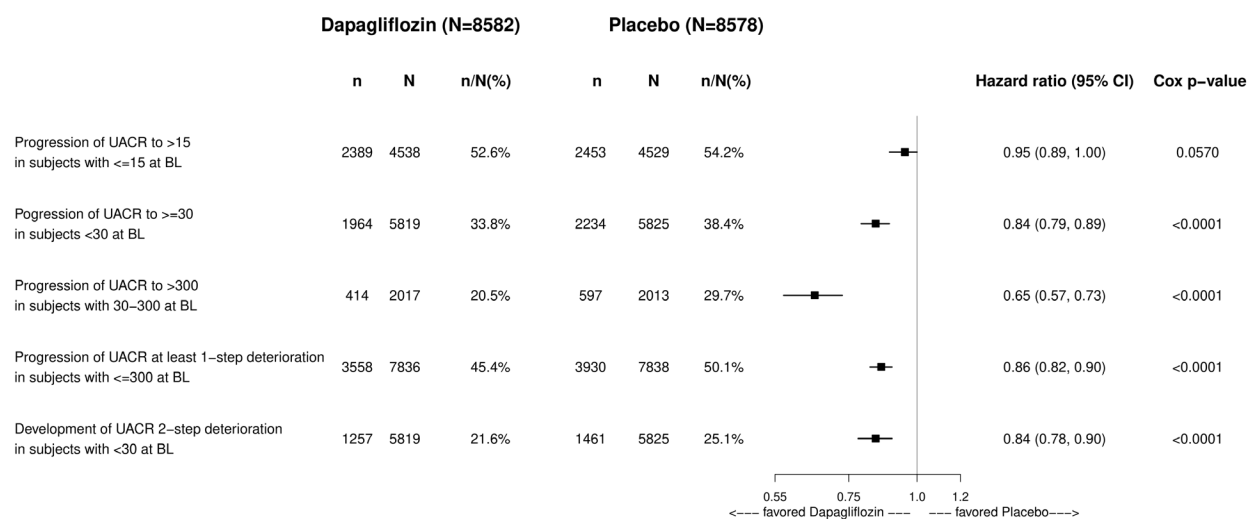

**Figure S2:** Deterioration in categorical albuminuria status over time (Kaplan-Meier estimate):

- A- New onset of >15 mg/g in patients with ≤15 mg/g at baseline
- B- New onset of ≥30 mg/g in patients with <30 mg/g at baseline
- C- New onset of >300 mg/g in patients with ≤300 mg/g at baseline

A-

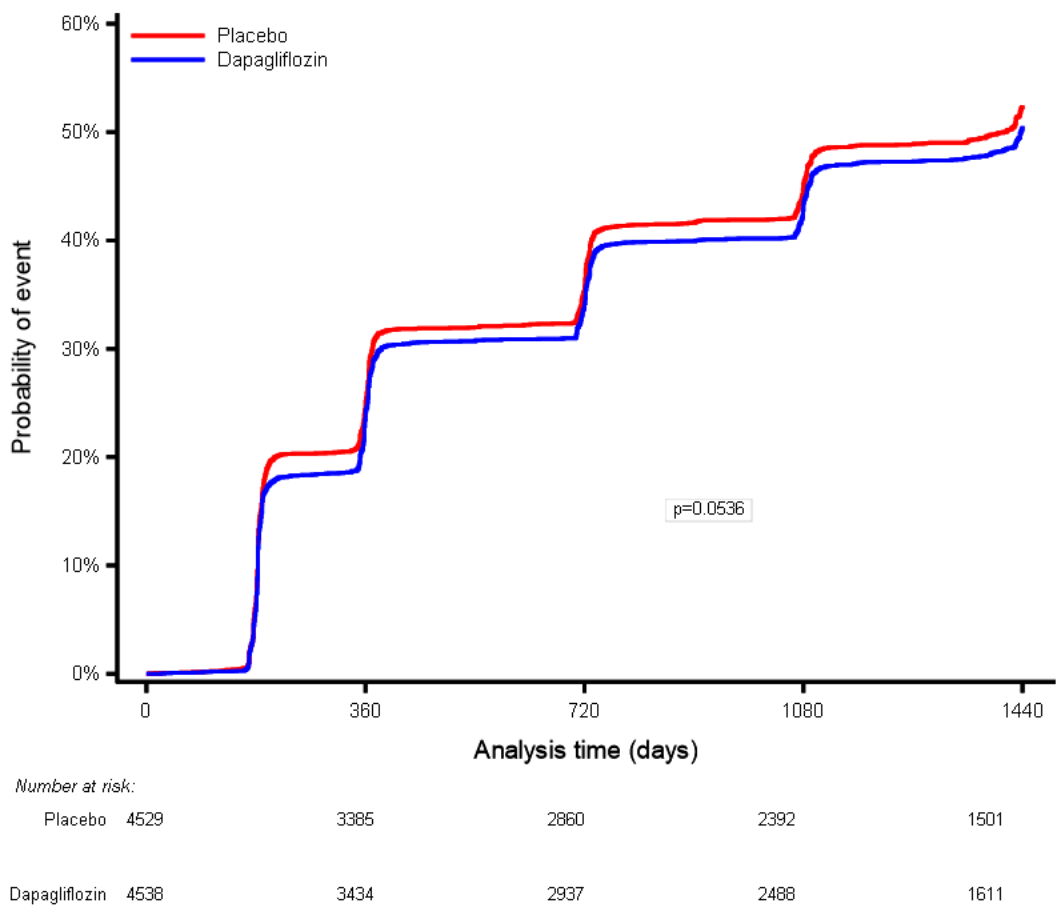

P=0.0536

B-

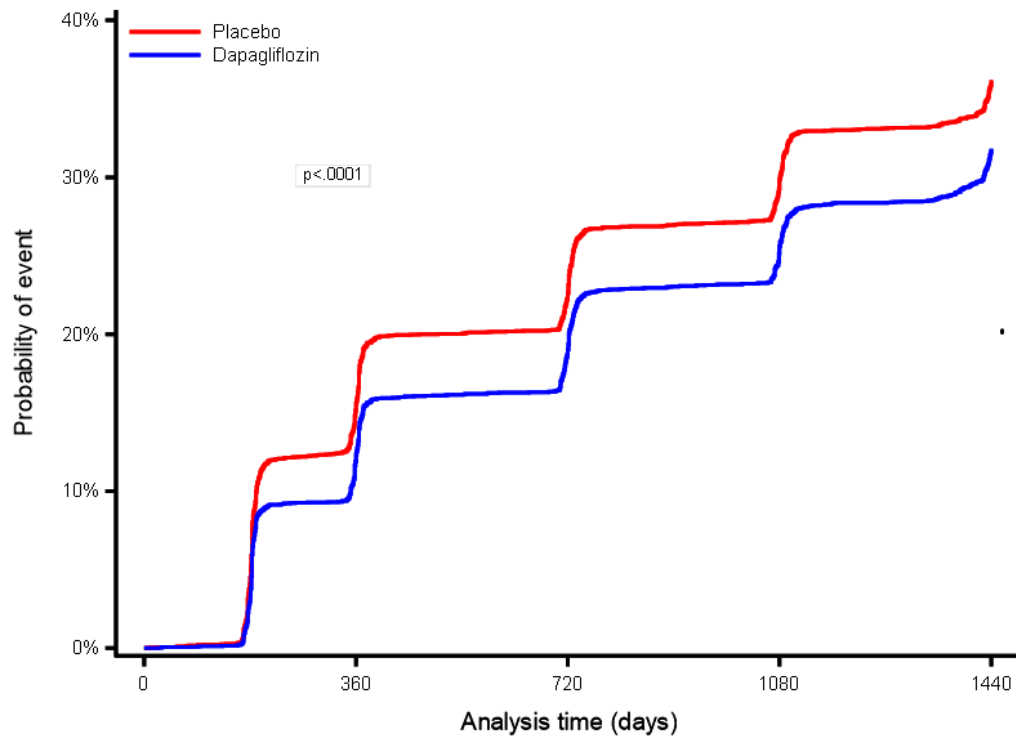

Number at risk:

|               |      |      |      |      |      |
|---------------|------|------|------|------|------|
| Placebo       | 5825 | 4875 | 4391 | 3915 | 2543 |
| Dapagliflozin | 5819 | 5059 | 4600 | 4147 | 2757 |

C-

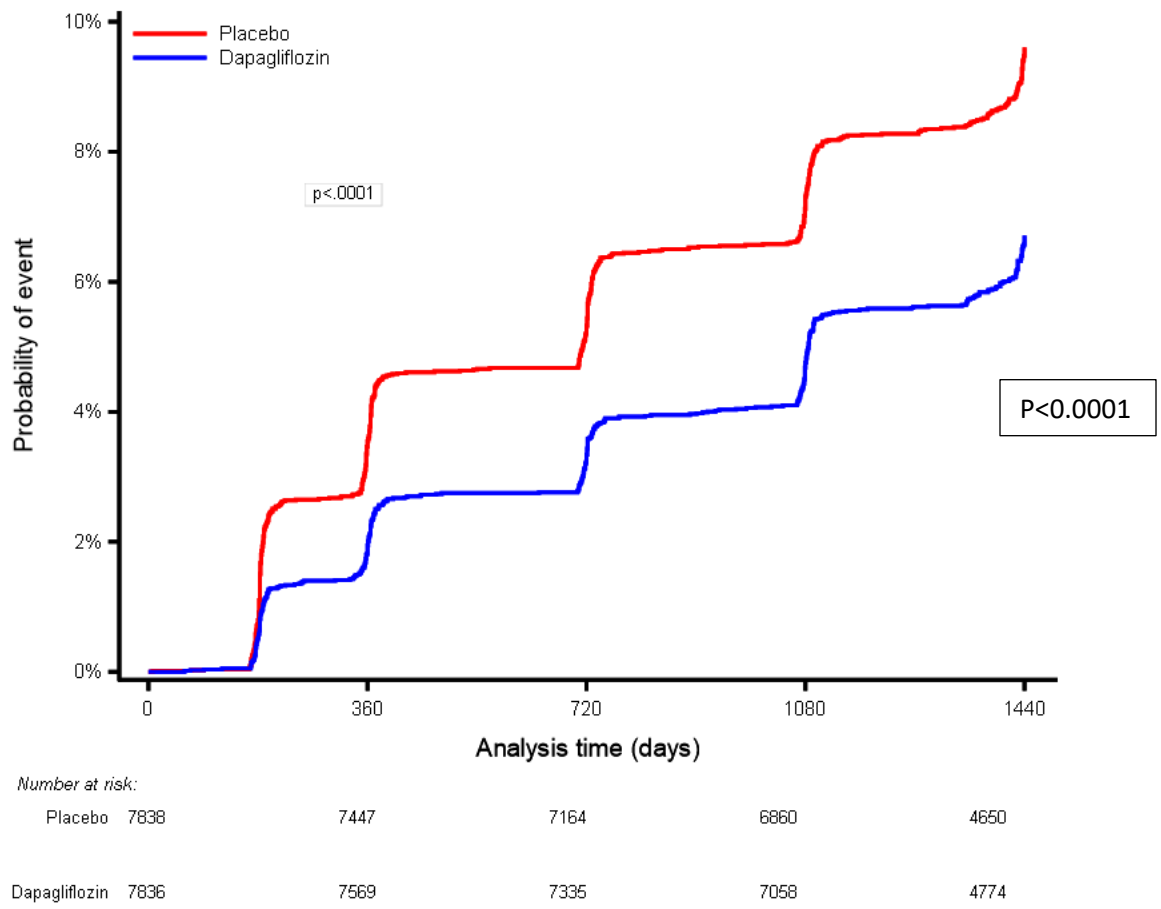

Supplement: Supplementary file 1 [file 28920753]
